# Supplementary material
Source: Springer Nature journal article supplement (https://www.springermedizin.de/resource/supplementary/13069_2012_124_MOESM1_ESM.pdf/9659870)

**A****Immunophenotype of dermal fibroblasts**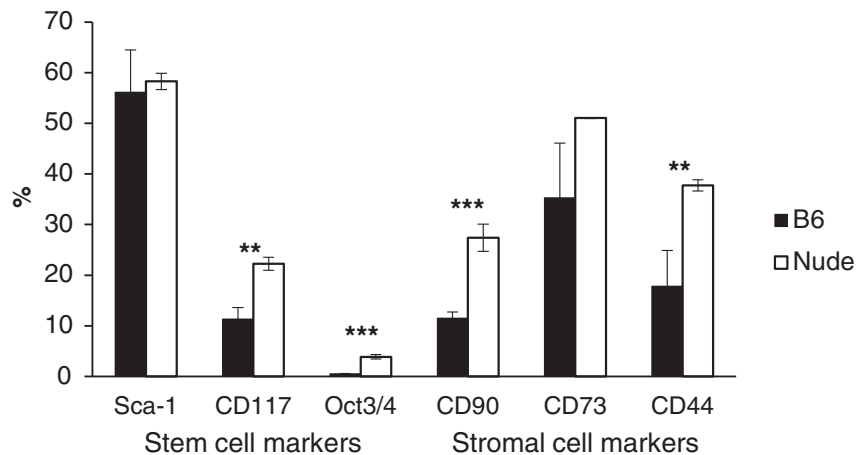**B**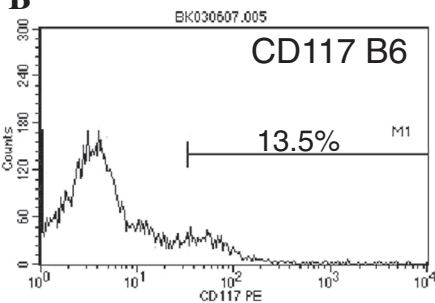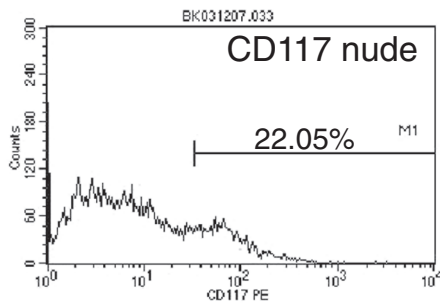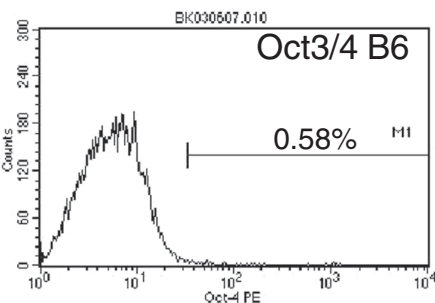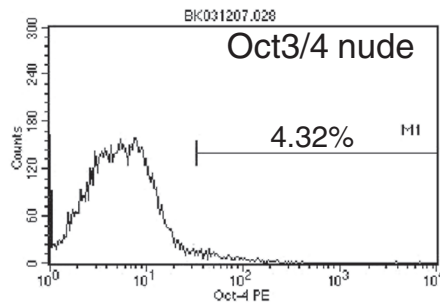

Supplement: MOESM1 [file 9659870]
